# Supplementary material for: N-Glycosylation Site in the Middle Region Is Involved in the Sperm-Binding Activity of Bovine Zona Pellucida Glycoproteins ZP3 and ZP4
Source: MDPI journal article supplement (doi:10.3390/biom13111636), 2023-11-10
Supplement: s1 [file s1]

Figure 2B

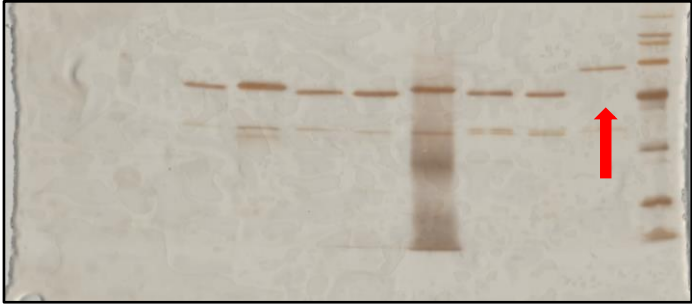

bZP4(25-464)

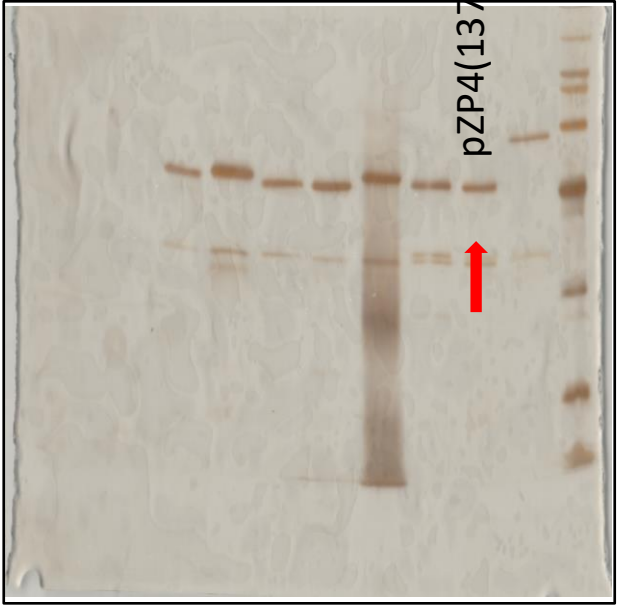

pZP4(137-462)

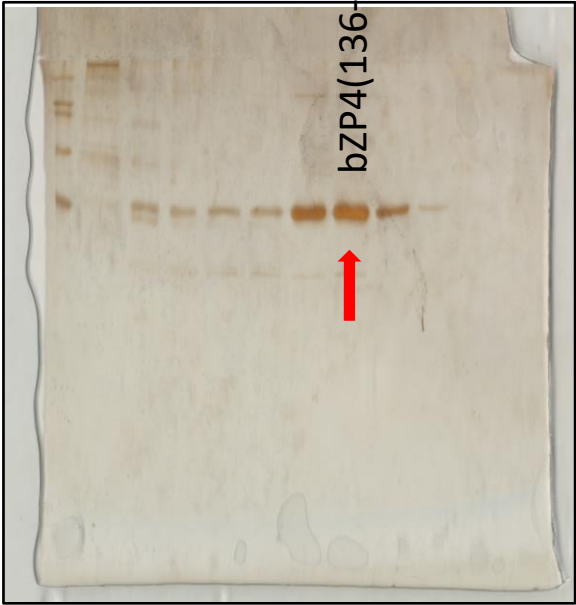

bZP4(136-464)

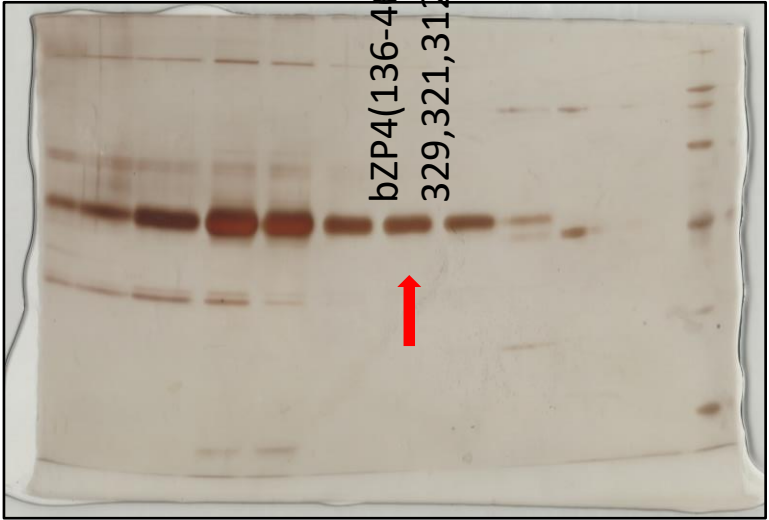

bZP4(136-464)/pZP4(333,326-329,321,312-315,299-302)

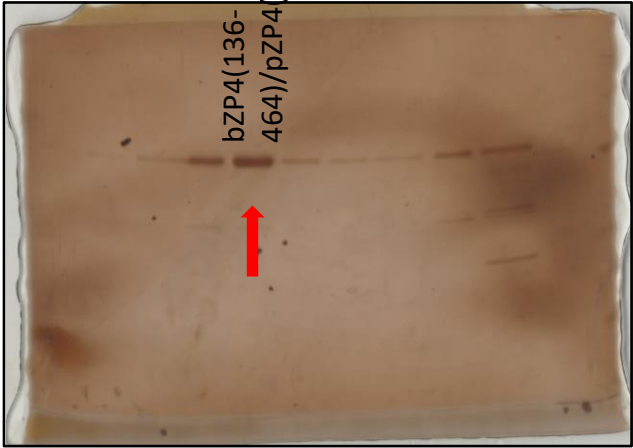

bZP4(136-464)/pZP4(333,326-329)

Figure 2B

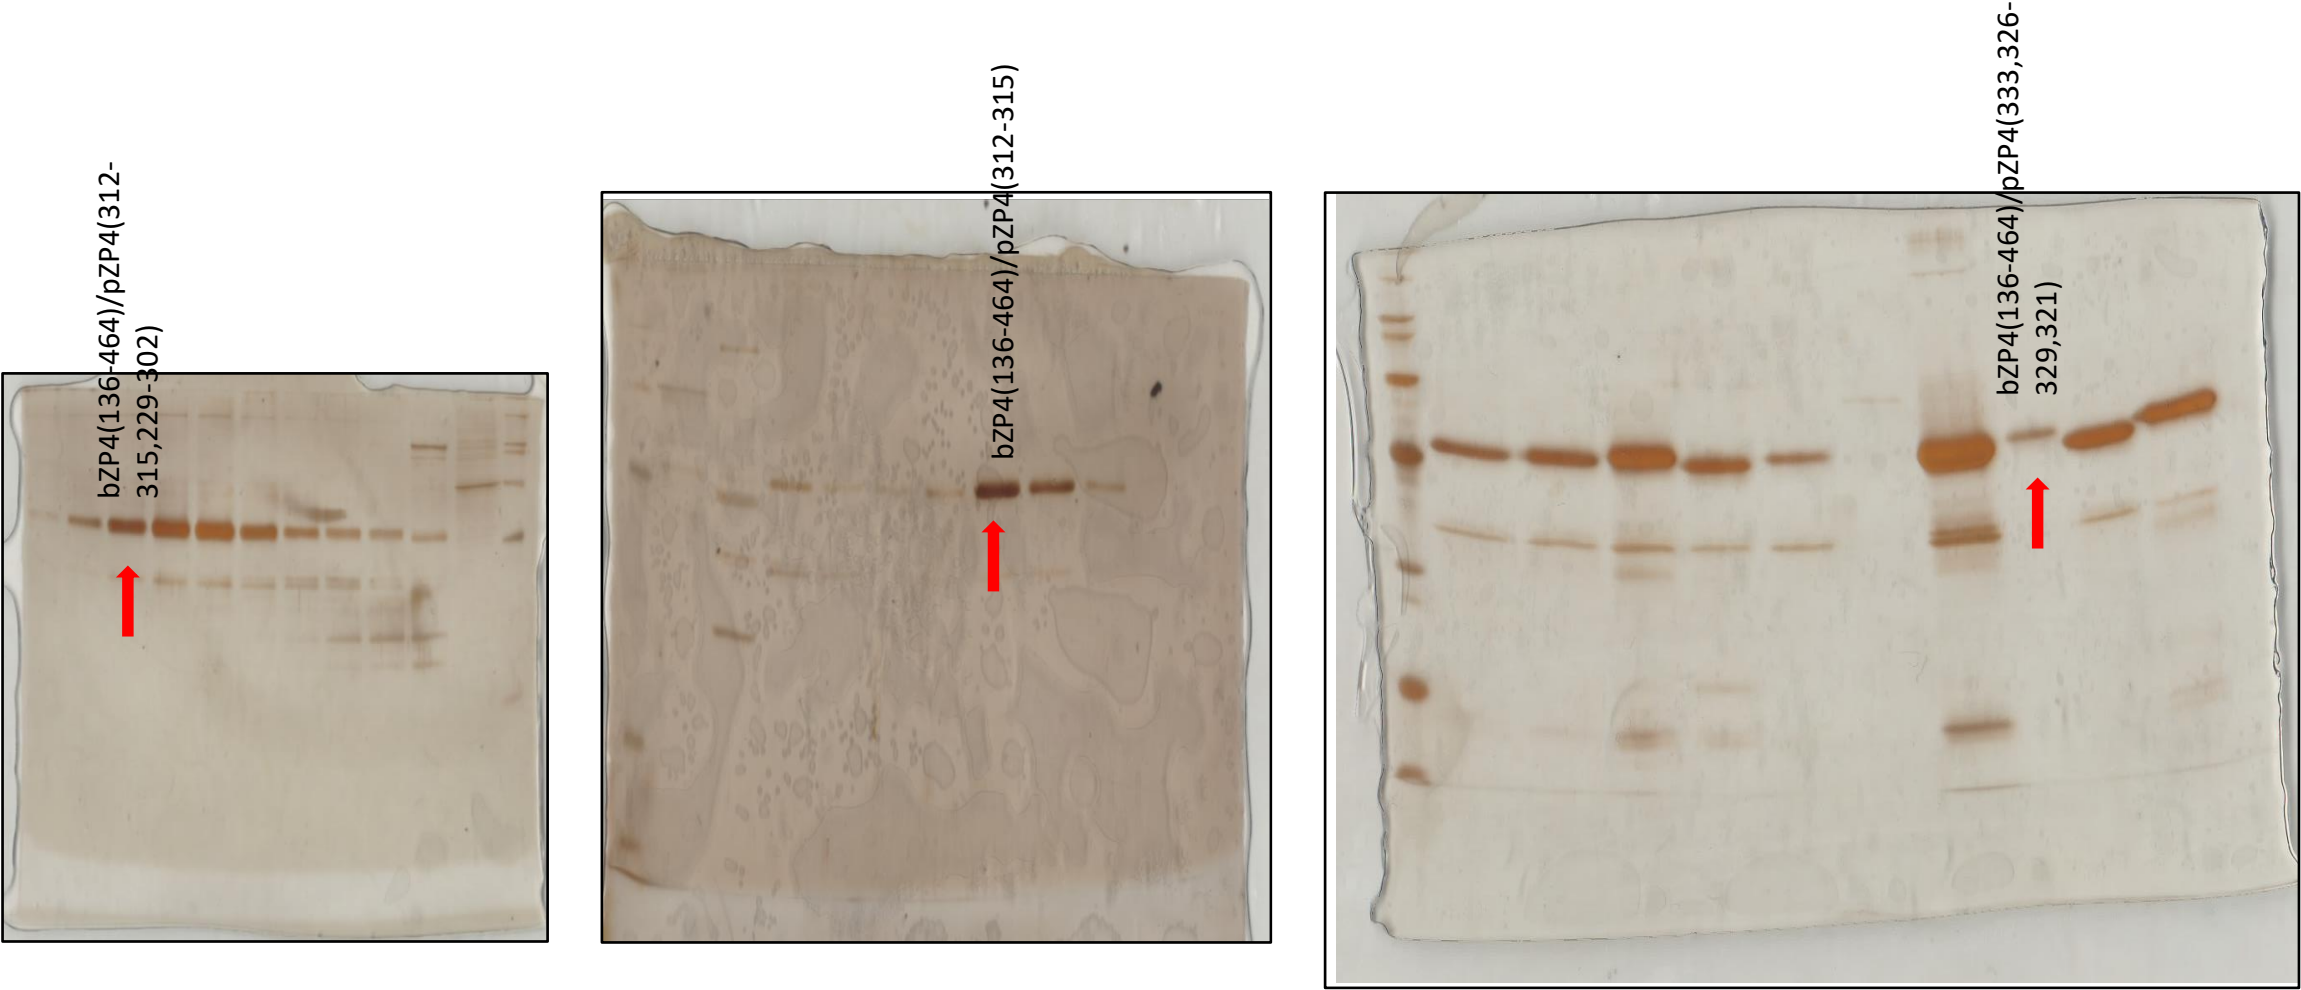

Figure 3B

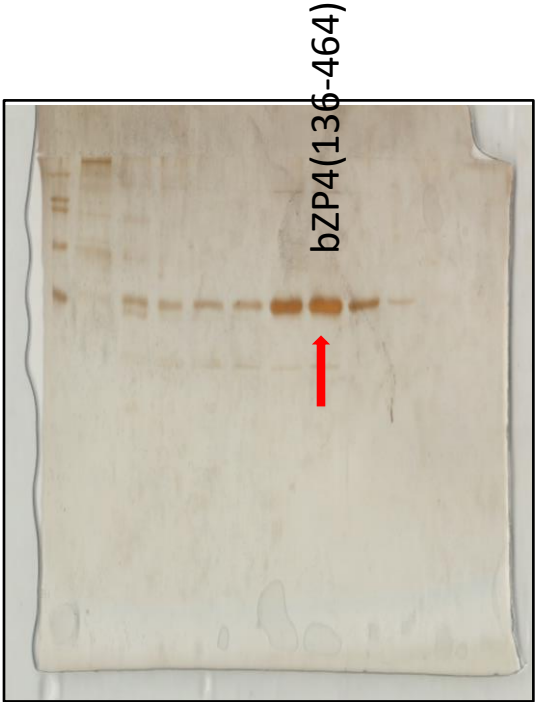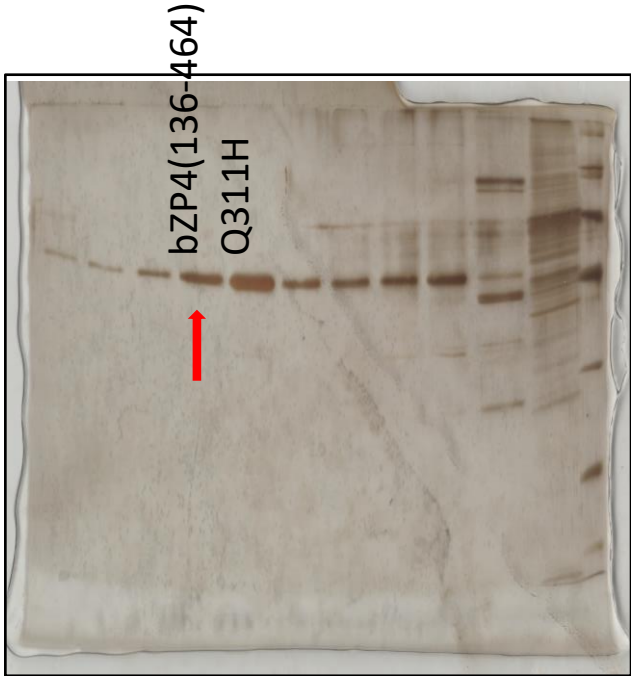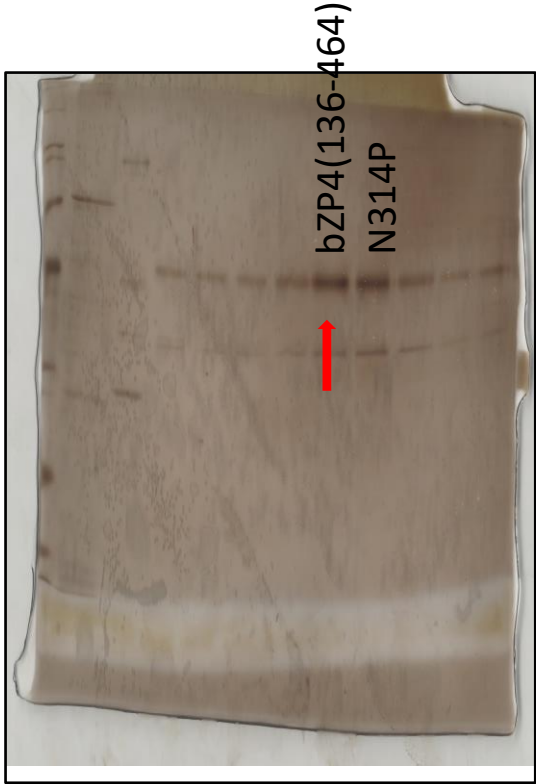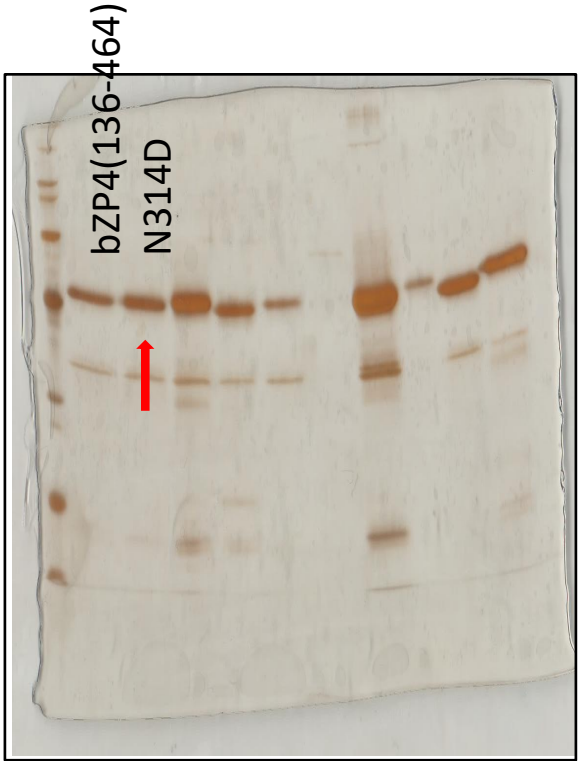

Figure 3E

bZP4(136-464)  
bZP4(136-464)N314D  
bZP4(136-464)

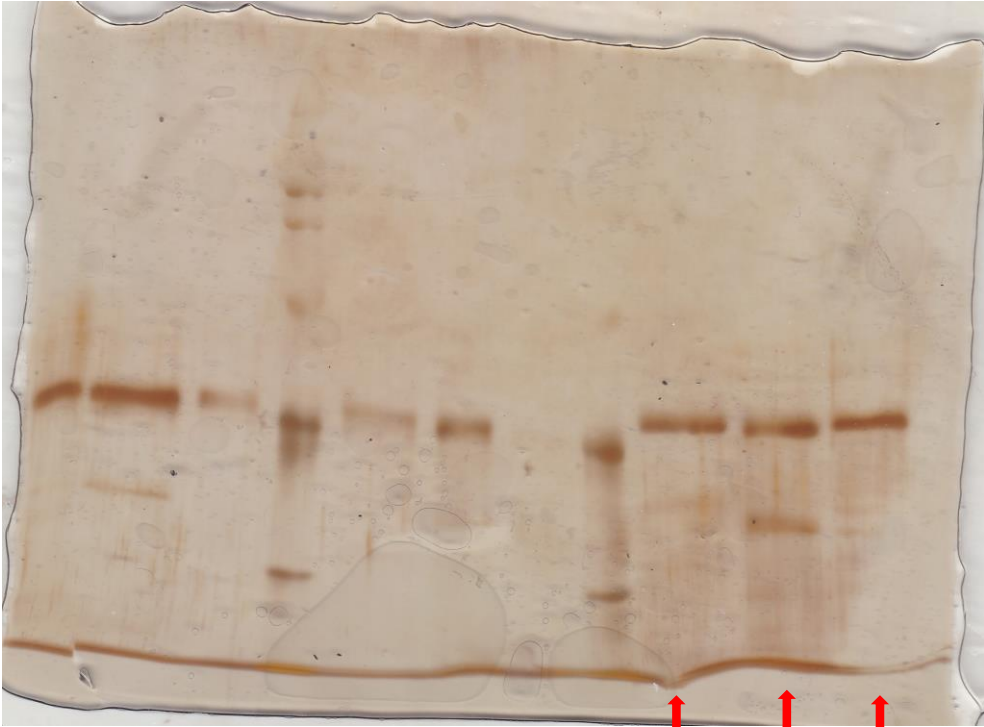

bZP4(136-464)  
bZP4(136-464)N314P  
bZP4(136-464)

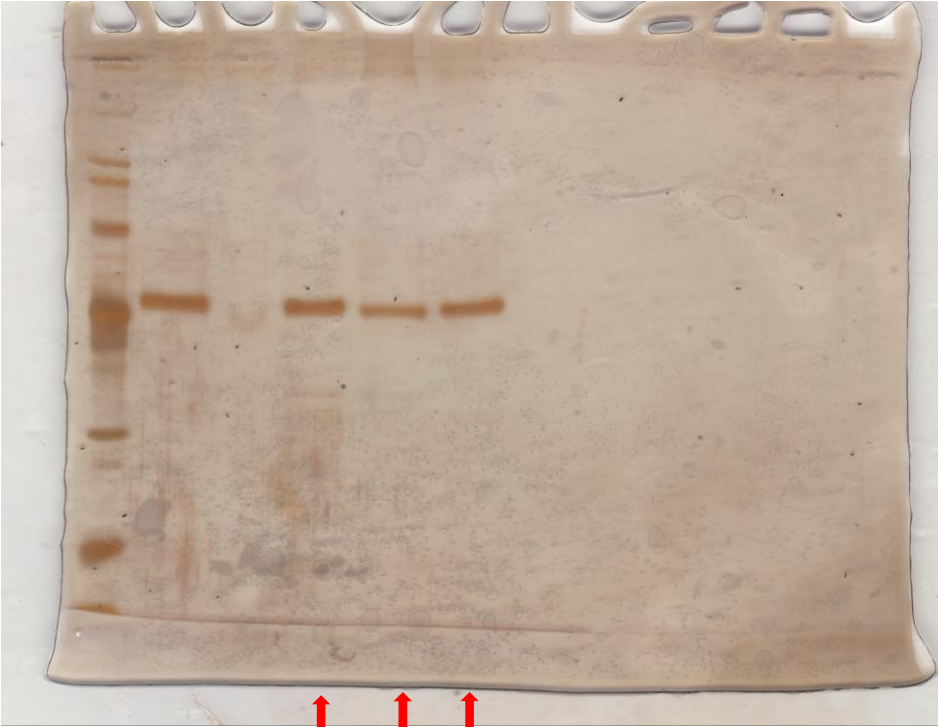



Figure 4B

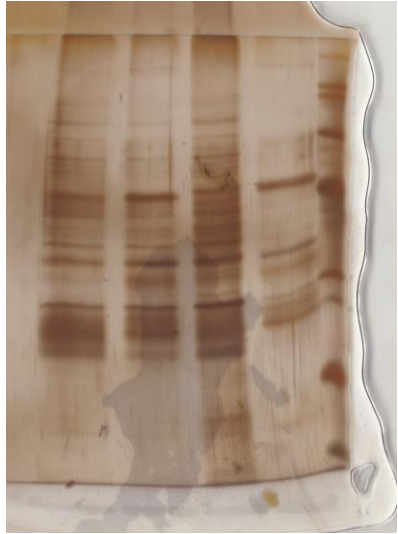

bZP3(32-178)/  
bZP4(136-464)

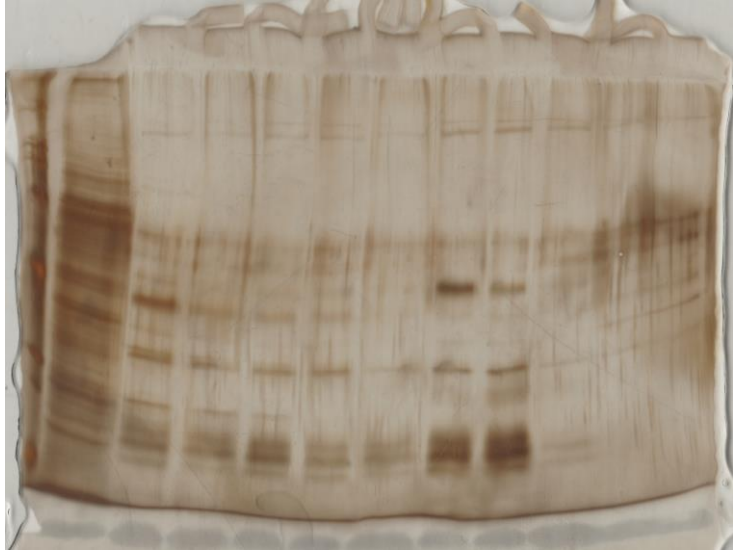

bZP3(32-178)N146D/  
bZP4(136-464)

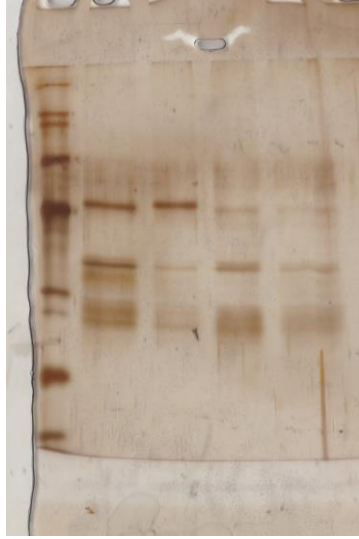

bZP3(32-178)/  
bZP4(136-464)N314D

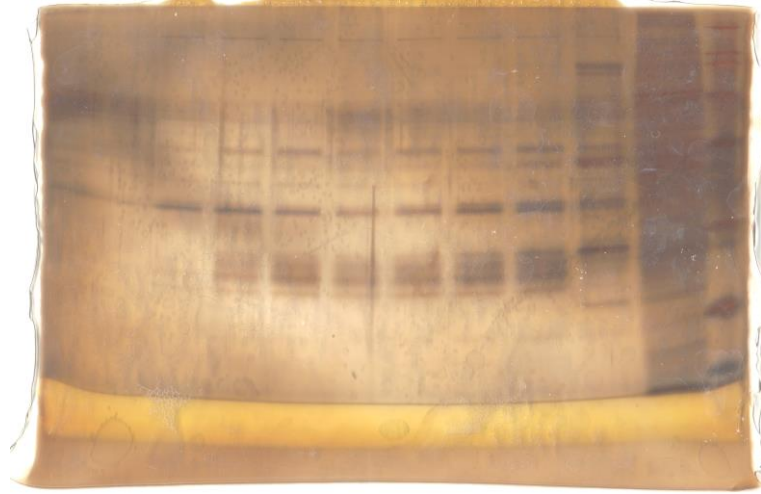

bZP3(32-178)N146D/  
bZP4(136-464)N314D
